# Supplementary material
Source: HighWire-hosted journal article supplement (https://srh.bmj.com/content/bmjsrh-2020-200687)
Supplement: inline-supplementary-material-1 [file inline-supplementary-material-1.pdf]

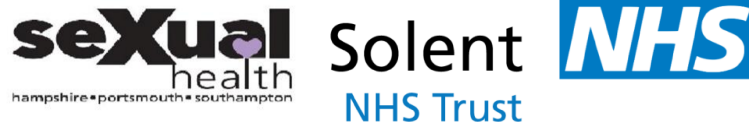

## Would you like to receive your medication by post?

Some of our NHS services are currently undergoing a change. We aim to help our patients to have a better access to our services using new online services such as the [www.letstalkaboutit.nhs.uk](http://www.letstalkaboutit.nhs.uk) website.

### About Medication by Post

We are currently exploring methods in which we could deliver our medications such as chlamydia treatment or contraceptive pills (for women) by post. Such a method would allow some of our patients to receive medication without the need to visit the clinic. This survey aims to explore if 'medication-by-post' is an acceptable method for our patients and we would like to design the most suitable service that can meet your needs.

We will be asking you some questions about yourself, your sexual health, and your views on potential 'medication-by-post' services. Everything is anonymous and will be treated in the strictest confidence. The data we collect will help us decide how we might be able to improve our sexual health services.

This survey is voluntary and you can stop at any time without giving a reason.

This survey is for service development purposes only. Please return your responses to the reception or send them with your STI test kit. The completion of the survey will indicate that you agree for the answers to be analysed and published.

For more information about this survey, please contact Dr Tom Nadarzynski ([t.nadarzynski@soton.ac.uk](mailto:t.nadarzynski@soton.ac.uk))

Please tell us about yourself, all information is confidential.

Answer each question by circling an answer

|                                         |                     |                |                 |          |                   |            |         |
|-----------------------------------------|---------------------|----------------|-----------------|----------|-------------------|------------|---------|
| <b>1. Age</b>                           | <18                 | 18-24          | 25-34           | 35-44    | 45-54             | 55-64      | Over 65 |
| <b>2. How do you identify yourself?</b> |                     |                |                 | Male     | Female            | Non-binary | Other   |
| <b>3. Ethnicity</b>                     | White               | Black African  | Black Caribbean | Asian    | Mixed race        | Other      |         |
| <b>4. Sexual orientation</b>            | Straight            |                | Gay or Lesbian  | Bisexual | Prefer not say    | Other      |         |
| <b>5. Education</b>                     | No formal education | Primary school | High school     | College  | University degree |            |         |

|                                                                               |     |    |          |
|-------------------------------------------------------------------------------|-----|----|----------|
| <b>6. Are you registered with a GP?</b>                                       | Yes | No | Not sure |
| <b>7. Have you ever been diagnosed with a sexually transmitted infection?</b> | Yes | No | Not sure |
| <b>8. Have you ever collected any medication at pharmacy?</b>                 | Yes | No | Not sure |
| <b>9. Have you ever received any medication via post?</b>                     | Yes | No | Not sure |

|                                                                                                     |                          |                                 |                          |                      |
|-----------------------------------------------------------------------------------------------------|--------------------------|---------------------------------|--------------------------|----------------------|
| <b>10. How often do you test for sexually transmitted infections?</b>                               | It is my first time      | Once every few years            | Once a year              | Several times a year |
| <b>11. What is your most preferred way to test for sexually transmitted infection?</b>              | Using online testing kit | Visiting sexual health clinic   | Visiting my GP           | Other: .....         |
| <b>12. What is your most preferred way to receive your medication?</b>                              | Delivered to home        | Given by a doctor at the clinic | Collected at my pharmacy | Other: .....         |
| <b>13. If you were diagnosed with chlamydia, where would you prefer to collect your medication?</b> | Delivered to home        | Given by a doctor at the clinic | Collected at my pharmacy | Other: .....         |

|                                                                                                                  |     |    |          |
|------------------------------------------------------------------------------------------------------------------|-----|----|----------|
| <b>14. Would you be willing to receive medication (antibiotic) to treat chlamydia by post?</b>                   | Yes | No | Not sure |
| <b>15. Are you concerned about your confidentiality of receiving medication by post?</b>                         | Yes | No | Not sure |
| <b>16. Would you be concerned about the delivery of your medication if you were not at home?</b>                 | Yes | No | Not sure |
| <b>17. Would you be willing to be contacted by a health advisor via phone to finalise your medication order?</b> | Yes | No | Not sure |
| <b>18. Would you be willing to disclose any pre-existing medical conditions, allergies and medications?</b>      | Yes | No | Not sure |

|                                                                                                                                            |     |    |          |
|--------------------------------------------------------------------------------------------------------------------------------------------|-----|----|----------|
| <b>19. Would you be willing to register your name and contact details in order to receive your medication?</b>                             | Yes | No | Not sure |
| <b>20. Would you be willing to fill in a medical questionnaire online to receive medication by post?</b>                                   | Yes | No | Not sure |
| <b>21. Would you require a track delivery that needs to be signed-for by you?</b>                                                          | Yes | No | Not sure |
| <b>22. If you receive your medication by post, would you still feel the need to discuss the dosage and side-effects with a pharmacist?</b> | Yes | No | Not sure |
| <b>23. Would you like to receive mobile phone text updates about the status of your delivery order?</b>                                    | Yes | No | Not sure |

|                                                                                                                                    |                   |                       |                       |                       |
|------------------------------------------------------------------------------------------------------------------------------------|-------------------|-----------------------|-----------------------|-----------------------|
| <b>24. How long would you expect this medication (antibiotic) to arrive?</b>                                                       | Next day delivery | Within 3 working days | Within 5 working days | Within 7 working days |
| <b>25. If your medication (antibiotic) did not turn up to your address, how long would you wait before you contact the clinic?</b> | 1 day             | 2-3 days              | 4-7 days              | Over a week           |
| <b>26. If you had questions about your medication, who would you prefer to contact for advice?</b>                                 | My GP             | Sexual health clinic  | Pharmacy              | Other: .....          |

– For Women Only –

|                                                                                                                  |     |    |          |
|------------------------------------------------------------------------------------------------------------------|-----|----|----------|
| <b>27. Would you be willing to receive medication (contraceptive pills) by post?</b>                             | Yes | No | Not sure |
| <b>28. Would you be willing to provide your blood pressure reading before you order your medication?</b>         | Yes | No | Not sure |
| <b>29. Would you be willing to receive the generic (non-branded) version of the contraceptive pills by post?</b> | Yes | No | Not sure |

|                                                                                                                                |                   |                                 |                          |                       |
|--------------------------------------------------------------------------------------------------------------------------------|-------------------|---------------------------------|--------------------------|-----------------------|
| <b>30. How quickly would you need your contraceptive pills?</b>                                                                | Next day delivery | Within 3 working days           | Within 5 working days    | Within 7 working days |
| <b>31. If your contraceptive pills did not turn up to your address, how long would you wait before you contact the clinic?</b> | 1 day             | 2-3 days                        | 4-7 days                 | Over a week           |
| <b>32. If you were to receive your contraceptive pills, where would you prefer to collect them?</b>                            | Delivered to home | Given by a doctor at the clinic | Collected at my pharmacy | Other: .....          |

Once completed, please return the survey in the envelope to either the reception of the sexual health clinic or with your online test.
